# Supplementary material
Source: PubMed Central journal article supplement (PMC3048371)
Supplement: pgen.1001323.s004.pdf [file pgen.1001323.s004.pdf]

| Analysis                                                 |                     | $\lambda_{GC}$      |                  |
|----------------------------------------------------------|---------------------|---------------------|------------------|
|                                                          |                     | prior to adjustment | after adjustment |
| anti-dsDNA + SLE cases compared to healthy controls      | Discovery dataset   | 1.171               | 1.045            |
|                                                          | Replication dataset | 1.053               | 1.038            |
|                                                          | Joint analysis      | 1.137               | 1.048            |
| anti-dsDNA - SLE cases compared to healthy controls      | Discovery dataset   | 1.267               | 1.029            |
|                                                          | Replication dataset | 1.050               | 1.049            |
|                                                          | Joint analysis      | 1.238               | 1.045            |
| Case-only: anti-dsDNA + SLE compared to anti-dsDNA - SLE |                     | 1.011               | 1.000            |
| All SLE cases compared to healthy controls               |                     | 1.317               | 1.080            |
